# Supplementary material for: Contribution of Statins towards Periodontal Treatment: A Review
Source: Mediators Inflamm. 2019 Feb 27;2019:6367402. doi: 10.1155/2019/6367402 (PMC6415285; doi:10.1155/2019/6367402)
Supplement: Supplementary Materials — Risk of bias assessment of included clinical studies. [file 6367402.f1.pdf]

**Supplemental table 1: Risk of bias assessment**

| Study                  | Random sequence generation | Allocation concealment | Blinding of participants and personnel | Blinding of outcome assessment | Incomplete outcome data | Selective reporting | Other sources of bias |
|------------------------|----------------------------|------------------------|----------------------------------------|--------------------------------|-------------------------|---------------------|-----------------------|
| Agarwal et al. 2016    | Low risk                   | High risk              | Low risk                               | Low risk                       | Low risk                | Low risk            | Low risk              |
| Cunha-cruz et al. 2006 | High risk                  | High risk              | High risk                              | High risk                      | High risk               | High risk           | High risk             |
| Dileep et al. 2018     | Low risk                   | High risk              | Low risk                               | Low risk                       | Low risk                | Low risk            | Low risk              |
| Fajardo et al. 2010    | Low risk                   | Low risk               | Low risk                               | Low risk                       | Low risk                | Low risk            | Low risk              |
| Fentoğlu et al. 2012   | High risk                  | High risk              | High risk                              | High risk                      | Low risk                | Low risk            | High risk             |
| Fentoğlu et al. 2010   | High risk                  | High risk              | High risk                              | High risk                      | Low risk                | Low risk            | Low risk              |
| Garg et al. 2017       | Low risk                   | High risk              | Low risk                               | Low risk                       | Low risk                | Low risk            | Low risk              |
| Grover et al. 2016     | High risk                  | High risk              | High risk                              | High risk                      | Low risk                | Low risk            | Low risk              |
| Gunjiganur et al. 2017 | Low risk                   | High risk              | Low risk                               | Low risk                       | Low risk                | Low risk            | Low risk              |
| Kinra et al. 2010      | High risk                  | High risk              | Low risk                               | Low risk                       | Low risk                | Low risk            | Low risk              |
| Kumari et al. 2016     | Low risk                   | High risk              | Low risk                               | Low risk                       | Low risk                | Low risk            | Low risk              |
| Kumari et al. 2017     | Low risk                   | High risk              | Low risk                               | Low risk                       | Low risk                | Low risk            | High risk             |
| Martande et al. 2016   | Low risk                   | High risk              | Low risk                               | High risk                      | Low risk                | Low risk            | Low risk              |
| Martande et al. 2017   | Low risk                   | High risk              | Low risk                               | High risk                      | Low risk                | Low risk            | High risk             |
| Meisel et al. 2014     | High risk                  | High risk              | High risk                              | High risk                      | Low risk                | Low risk            | High risk             |
| Priyanka et al. 2017   | Low risk                   | High risk              | Low risk                               | Low risk                       | Low risk                | Low risk            | Low risk              |
| Poston et al. 2016     | High risk                  | High risk              | High risk                              | High risk                      | Low risk                | Low risk            | Low risk              |

|                       |           |           |           |           |          |          |           |
|-----------------------|-----------|-----------|-----------|-----------|----------|----------|-----------|
| Pradeep et al. 2010   | Low risk  | High risk | Low risk  | Low risk  | Low risk | Low risk | High risk |
| Pradeep et al. 2012   | Low risk  | High risk | Low risk  | Low risk  | Low risk | Low risk | Low risk  |
| Pradeep et al. 2013   | Low risk  | High risk | Low risk  | Low risk  | Low risk | Low risk | Low risk  |
| Pradeep et al. 2013   | Low risk  | High risk | Low risk  | Low risk  | Low risk | Low risk | Low risk  |
| Pradeep et al. 2015   | Low risk  | High risk | Low risk  | Low risk  | Low risk | Low risk | High risk |
| Pradeep et al. 2015   | Low risk  | High risk | Low risk  | High risk | Low risk | Low risk | Low risk  |
| Pradeep et al. 2016   | Low risk  | High risk | Low risk  | Low risk  | Low risk | Low risk | Low risk  |
| Pradeep et al. 2016   | Low risk  | High risk | Low risk  | Low risk  | Low risk | Low risk | Low risk  |
| Pradeep et al. 2017   | Low risk  | High risk | Low risk  | Low risk  | Low risk | Low risk | High risk |
| Rajan et al. 2017     | Low risk  | High risk | Low risk  | Low risk  | Low risk | Low risk | Low risk  |
| Rao et al. 2013       | Low risk  | High risk | Low risk  | Low risk  | Low risk | Low risk | Low risk  |
| Rath et al., 2012     | Low risk  | High risk | High risk | High risk | Low risk | Low risk | High risk |
| Rosenberg et al. 2015 | Low risk  | Low risk  | Low risk  | Low risk  | Low risk | Low risk | Low risk  |
| Sangwan et al. 2016   | High risk | High risk | Low risk  | Low risk  | Low risk | Low risk | Low risk  |
| Surve et al. 2015     | High risk | High risk | High risk | High risk | Low risk | Low risk | Low risk  |
